# Supplementary material
Source: publisher figshare collection journal article supplement (https://sage.figshare.com/ndownloader/files/13612547)
Supplement: Supplementary file 1 [file 13612547]

## Appendix 1

**Data collection table for floor production**

| Subcategory       | Indicator                              | Data Sources                                                                      | Status                                                                                                                                                                                                                                                                                                                                                                                                                                                                                                                                                                                                                          |
|-------------------|----------------------------------------|-----------------------------------------------------------------------------------|---------------------------------------------------------------------------------------------------------------------------------------------------------------------------------------------------------------------------------------------------------------------------------------------------------------------------------------------------------------------------------------------------------------------------------------------------------------------------------------------------------------------------------------------------------------------------------------------------------------------------------|
| Fair salary       | Minimum wage, per month                | Ministry of human resources and social security of the People's Republic of China | China does not have a uniform minimum wage; Provinces, cities and autonomous regions may set their own minimum wage standards. The minimum wage in Foshan, Guangdong province is 1,510 RMB. The minimum wage is barely enough to survive, so many workers have to work long hours                                                                                                                                                                                                                                                                                                                                               |
|                   | Sector average wage, per month         | National Statistics Bureau of the People's Republic of China                      | In 2016, the average annual salary of employees in manufacturing cities and towns was 59,470 RMB, or 4,955.83 RMB per month                                                                                                                                                                                                                                                                                                                                                                                                                                                                                                     |
| Working time      | Hours of work per employee, per week   | International organization for the promotion of Labour                            | Chinese workers work an average of 47 hours a week                                                                                                                                                                                                                                                                                                                                                                                                                                                                                                                                                                              |
| Discrimination    | Gender wage gap                        | CSR report of nature flooring company                                             | 1:1                                                                                                                                                                                                                                                                                                                                                                                                                                                                                                                                                                                                                             |
| Health and safety | Presence of sufficient safety measures | CSR report of nature flooring company                                             | The enterprise has adequate safety protection measures, such as controlling the fire main pump system and the automatic spraying system of the workshop to ensure the fire safety of the workshop staff. The Grecon Mars probe was introduced to detect, prevent and extinguish the sparks generated by the equipment and to issue sound and light alarm. The improvement of UV external dryer ensures the health of employees. In addition, a safety director shall be set up in each factory to conduct safety training for all incoming employees. Organize local fire department on site training and fire drill regularly. |

|                                     |                                                                        |                                                              |                                                                                                                                                                                                                                                                                                                                                                                                                                                                     |
|-------------------------------------|------------------------------------------------------------------------|--------------------------------------------------------------|---------------------------------------------------------------------------------------------------------------------------------------------------------------------------------------------------------------------------------------------------------------------------------------------------------------------------------------------------------------------------------------------------------------------------------------------------------------------|
| Social benefits/<br>social security | Social security expenditures of the country/sector                     | National Statistics Bureau of the People's Republic of China | In 2016, the Chinese government's investment in social security (social security) accounted for only 7.2% of GDP.                                                                                                                                                                                                                                                                                                                                                   |
| Access to Material Resources        | Levels of Industrial Water Use                                         | The World Bank                                               | Chinese industrial sector accounted for 22% of total freshwater use in 2015                                                                                                                                                                                                                                                                                                                                                                                         |
|                                     | Does the organization have a certified environmental management system | CSR report of nature flooring company                        | The enterprise has obtained ISO 14001 certification.                                                                                                                                                                                                                                                                                                                                                                                                                |
| Local employment                    | Unemployment in the country                                            | National Statistics Bureau of the People's Republic of China | Chinese registered urban unemployment rate is 4% in 2016, and the rural unemployment rate will be even higher                                                                                                                                                                                                                                                                                                                                                       |
| Safe and Healthy Living Conditions  | Pollution level of the country                                         | The World Factbook                                           | China is one of the most polluted countries in the world. Sixteen of the 20 most polluted cities are in China. The main environmental problems are air and water pollution. Coastal damage is caused by land reclamation, industrial development and aquaculture. Poor land management results in soil erosion. Deforestation and habitat destruction. North China also faces a water shortage. In 2006, China's per capita carbon dioxide emissions were 4.7 tons. |
|                                     | Contrib. of sector to env. load, CO2-equiv, I-GHGCO2eTOTA L_agg        | CSR report of nature flooring company                        | The company has entered into a strategic partnership with the world expo BBS zero-carbon pavilion, becoming the first Chinese manufacturer to truly introduce zero-carbon products in the market. The carbon emission of every link of enterprise production is decreasing year by year. By 2011, the carbon emissions in the production stage will be 3,806.27 tons. It is estimated that with the improvement of science and technology, the                      |

|                                      |                                                    |                                       |                                                                                                                                                                                                                                                                                                                           |
|--------------------------------------|----------------------------------------------------|---------------------------------------|---------------------------------------------------------------------------------------------------------------------------------------------------------------------------------------------------------------------------------------------------------------------------------------------------------------------------|
|                                      |                                                    |                                       | annual carbon emissions will be reduced after that.                                                                                                                                                                                                                                                                       |
| Contribution to economic development | Contribution of the sector to economic development | CSR report of nature flooring company | In 2011, the profit and loss of the enterprise excluding the fair value of forestry assets was RMB 231.05 million; Other convertible profit resources of 92.7 million RMB, net profit of 310 million RMB.                                                                                                                 |
|                                      | Public expenditure on education                    | CSR report of nature flooring company | 2012 enterprises in terms of education donation of 38400 RMB, to colleges and universities offer scholarships and financial aid, the purpose is to cultivate and encourage more people to the century environmental protection green direction of talent development, sets up the environmental protection consciousness. |
